# Supplementary material for: Zeolitic Imidazole Framework/Silica Nanocomposite for Targeted Cancer Therapeutics: Comparative Study of Chemo-Drug Cisplatin (CPt) and Green Platinum (GPt) Efficacy
Source: MDPI journal article supplement (doi:10.3390/ijms25063157), 2024-03-09
Supplement: s1 [file s1]

Table S1. Statistical analysis on MCF7 (A, B) and HFF (C, D) as compared to the “no treatment control” (A, C) or cisplatin (B, D), in which the same corresponding concentrations were used (i.e., first dose of the nanocomposites was compared to the first dose of cisplatin).

| <b>A)</b><br>MCF7<br>Staistical Analysis compared to the “no treatment” control |                |         |               |         |              |         |              |         |
|---------------------------------------------------------------------------------|----------------|---------|---------------|---------|--------------|---------|--------------|---------|
| Treatment Group                                                                 | Concentration  |         |               |         |              |         |              |         |
|                                                                                 | 0.025 mg/ml    |         | 0.05 mg/ml    |         | 0.1 mg/ml    |         | 0.5 mg/ml    |         |
|                                                                                 | Significant    | P value | Significant   | P value | Significant  | P value | Significant  | P value |
| ZIF-8/Silica                                                                    | No             | 0.2338  | No            | 0.3416  | No           | 0.183   | Yes          | 0.0001  |
| ZIF-8/Silica/Cp                                                                 | No             | 0.0579  | No            | 0.093   | Yes          | 0.0427  | Yes          | 0.0001  |
| ZIF-8/Silica/GPt                                                                | No             | 0.9076  | No            | 0.273   | No           | 0.2407  | Yes          | 0.0001  |
| ZIF-8/Silica/Cp/PEG                                                             | No             | 0.6002  | No            | 0.4905  | Yes          | 0.0208  | Yes          | 0.0001  |
| ZIF-8/Silica/GPt/PEG                                                            | No             | 0.3931  | No            | 0.2588  | No           | 0.1531  | Yes          | 0.0001  |
|                                                                                 | 0.001125 mg/ml |         | 0.00225 mg/ml |         | 0.0045 mg/ml |         | 0.0225 mg/ml |         |
| Cp                                                                              | Yes            | 0.0147  | Yes           | 0.0288  | No           | 0.1347  | Yes          | 0.0045  |
|                                                                                 | 0.00945 mg/ml  |         | 0.0189 mg/ml  |         | 0.0378 mg/ml |         | 0.189 mg/ml  |         |
| GPt                                                                             | No             | 0.4415  | No            | 0.1752  | No           | 0.0638  | Yes          | 0.0275  |

| <b>B)</b><br>MCF7<br>Staistical Analysis compared to cisplatin |                |         |               |         |              |         |              |         |
|----------------------------------------------------------------|----------------|---------|---------------|---------|--------------|---------|--------------|---------|
| Treatment Group                                                | Concentration  |         |               |         |              |         |              |         |
|                                                                | 0.025 mg/ml    |         | 0.05 mg/ml    |         | 0.1 mg/ml    |         | 0.5 mg/ml    |         |
|                                                                | Significant    | P value | Significant   | P value | Significant  | P value | Significant  | P value |
| ZIF-8/Silica                                                   | No             | 0.5753  | No            | 0.972   | No           | 0.9975  | No           | 0.7141  |
| ZIF-8/Silica/Cp                                                | No             | 0.7941  | No            | 0.5291  | No           | 0.8909  | No           | 0.7141  |
| ZIF-8/Silica/GPt                                               | No             | 0.6795  | No            | 0.9861  | No           | >0.9999 | No           | 0.7141  |
| ZIF-8/Silica/Cp/PEG                                            | No             | 0.5764  | No            | 0.594   | No           | 0.9886  | No           | 0.7141  |
| ZIF-8/Silica/GPt/PEG                                           | No             | 0.9967  | No            | 0.9983  | No           | 0.9989  | No           | 0.7141  |
|                                                                | 0.001125 mg/ml |         | 0.00225 mg/ml |         | 0.0045 mg/ml |         | 0.0225 mg/ml |         |
| Cp vs. control                                                 | Yes            | 0.0147  | Yes           | 0.0288  | No           | 0.1346  | Yes          | 0.0045  |
|                                                                | 0.00945 mg/ml  |         | 0.0189 mg/ml  |         | 0.0378 mg/ml |         | 0.189 mg/ml  |         |
| GPt                                                            | No             | 0.457   | No            | 0.3218  | No           | 0.6489  | No           | 0.2982  |

| <b>C)</b> <b>HFF</b><br><b>Staistical Analysis compared to the “no treatment” control</b> |                |         |               |         |              |         |              |         |
|-------------------------------------------------------------------------------------------|----------------|---------|---------------|---------|--------------|---------|--------------|---------|
| Treatment Group                                                                           | Concentration  |         |               |         |              |         |              |         |
|                                                                                           | 0.025 mg/ml    |         | 0.05 mg/ml    |         | 0.1 mg/ml    |         | 0.5 mg/ml    |         |
|                                                                                           | Significant    | P value | Significant   | P value | Significant  | P value | Significant  | P value |
| ZIF-8/Silica                                                                              | No             | 0.0852  | No            | 0.1272  | No           | 0.1001  | Yes          | 0.0001  |
| ZIF-8/Silica/Cp                                                                           | No             | 0.2191  | No            | 0.2222  | No           | 0.1471  | Yes          | 0.0001  |
| ZIF-8/Silica/GPt                                                                          | Yes            | 0.0313  | No            | 0.2167  | No           | 0.1891  | Yes          | 0.0001  |
| ZIF-8/Silica/Cp/PEG                                                                       | No             | 0.1547  | No            | 0.1409  | Yes          | 0.0388  | Yes          | 0.0001  |
| ZIF-8/Silica/GPt/PEG                                                                      | Yes            | 0.026   | Yes           | 0.0335  | No           | 0.1887  | Yes          | 0.0001  |
|                                                                                           | 0.001125 mg/ml |         | 0.00225 mg/ml |         | 0.0045 mg/ml |         | 0.0225 mg/ml |         |
| Cp                                                                                        | No             | 0.1292  | No            | 0.0712  | Yes          | 0.005   | Yes          | 0.0001  |
|                                                                                           | 0.00945 mg/ml  |         | 0.0189 mg/ml  |         | 0.0378 mg/ml |         | 0.189 mg/ml  |         |
| GPt                                                                                       | No             | 0.2175  | No            | 0.1849  | Yes          | 0.0197  | Yes          | 0.0007  |

| D)                   | HFF<br>Staistical Analysis compared to cisplatin |               |               |             |              |             |                                                                                                                       |             |         |
|----------------------|--------------------------------------------------|---------------|---------------|-------------|--------------|-------------|-----------------------------------------------------------------------------------------------------------------------|-------------|---------|
|                      | Treatment Group                                  | Concentration |               |             |              |             |                                                                                                                       |             |         |
|                      |                                                  | 0.025 mg/ml   |               | 0.05 mg/ml  |              | 0.1 mg/ml   |                                                                                                                       | 0.5 mg/ml   |         |
|                      |                                                  | Significant   | P value       | Significant | P value      | Significant | P value                                                                                                               | Significant | P value |
| ZIF-8/Silica         | No                                               | 0.9896        | No            | 0.733       | Yes          | 0.0409      | Statistical analysis cannot be performed since the percentage cell viability for Cp at 0.0225 mg/ml is equal to zero. |             |         |
| ZIF-8/Silica/Cp      | No                                               | 0.8695        | No            | 0.3707      | No           | 0.1029      |                                                                                                                       |             |         |
| ZIF-8/Silica/GPt     | No                                               | 0.7163        | No            | 0.9412      | No           | 0.2063      |                                                                                                                       |             |         |
| ZIF-8/Silica/Cp/PEG  | No                                               | 0.387         | No            | 0.1255      | No           | 0.0514      |                                                                                                                       |             |         |
| ZIF-8/Silica/GPt/PEG | No                                               | 0.4071        | No            | 0.1623      | No           | 0.124       |                                                                                                                       |             |         |
|                      | 0.001125 mg/ml                                   |               | 0.00225 mg/ml |             | 0.0045 mg/ml |             |                                                                                                                       |             |         |
| Cp vs. control       | No                                               | 0.1292        | No            | 0.0712      | Yes          | 0.0049      |                                                                                                                       |             |         |
|                      | 0.00945 mg/ml                                    |               | 0.0189 mg/ml  |             | 0.0378 mg/ml |             |                                                                                                                       |             |         |
| GPt                  | No                                               | 0.2957        | No            | 0.1083      | Yes          | 0.0019      |                                                                                                                       |             |         |

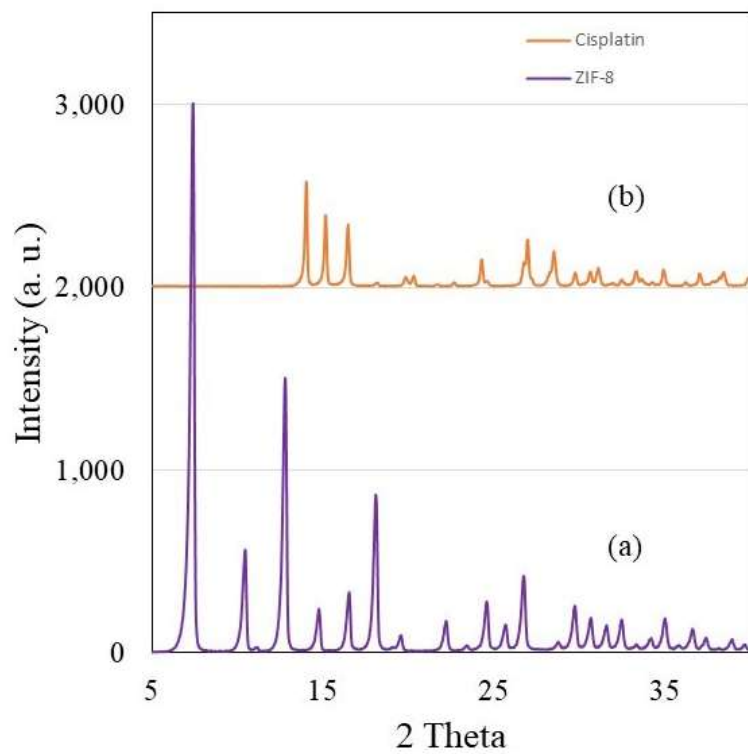

Fig S1. X-ray diffraction pattern of (a) ZIF-8 and (b) cisplatin.

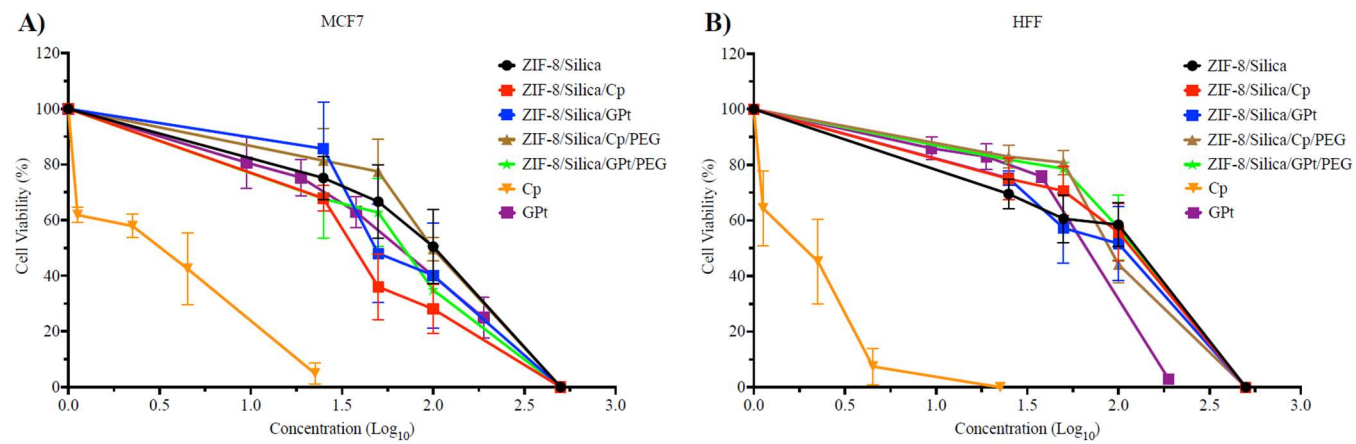

Fig. S2. Data from the cell viability assay presented in a Log scale. A) MCF7 and B) HFF cells were treated with the following conditions: ZIF-8/Silica, ZIF-8/Silica/Cp, ZIF-8/Silica/GPt, ZIF-8/Silica/Cp/PEG, ZIF-8/Silica/GPt/PEG, Cp, and GPt for 48h.
